# Supplementary material for: Diversity and Abundance of Bacterial and Fungal Communities Inhabiting Camellia sinensis Leaf, Rhizospheric Soil, and Gut of Agriophara rhombata
Source: MDPI journal article supplement (doi:10.3390/microorganisms11092188), 2023-08-30
Supplement: s1 [file s1]

### Supplementary material

**Supplementary Table S1.** Completely randomized design (CRD) Showing a total of six treatments, each with five replicates.

| No. | Treatments                            | Replicates                                        |
|-----|---------------------------------------|---------------------------------------------------|
| 1   | SOIL (YK10-T)                         | YK10-T-1, YK10-T-2, YK10-T-5, YK10-T-7, YK10-T-8  |
| 2   | TEA LEAF (YK10-Y)                     | YK10-Y-3, YK10-Y-5, YK10-Y-7, YK10-Y-9, YK10-Y-10 |
| 3   | Larval intestine (YK10-3)             | YK10-3-1, YK10-3-2, YK10-3-3, YK10-3-4, YK10-3-5  |
| 4   | Pupal intestinal tract (YK10-5)       | YK10-5-1, YK10-5-2, YK10-5-3, YK10-5-4, YK10-5-5  |
| 5   | Female moth intestine (YK10-C), (1-5) | YK10-C-1, YK10-C-2, YK10-C-3, YK10-C-4, YK10-C-5  |
| 6   | Male moth intestine (YK10-C), (6-10)  | YK10-C-6, YK10-C-7, YK10-C-8, YK10-C-9, YK10-C-10 |

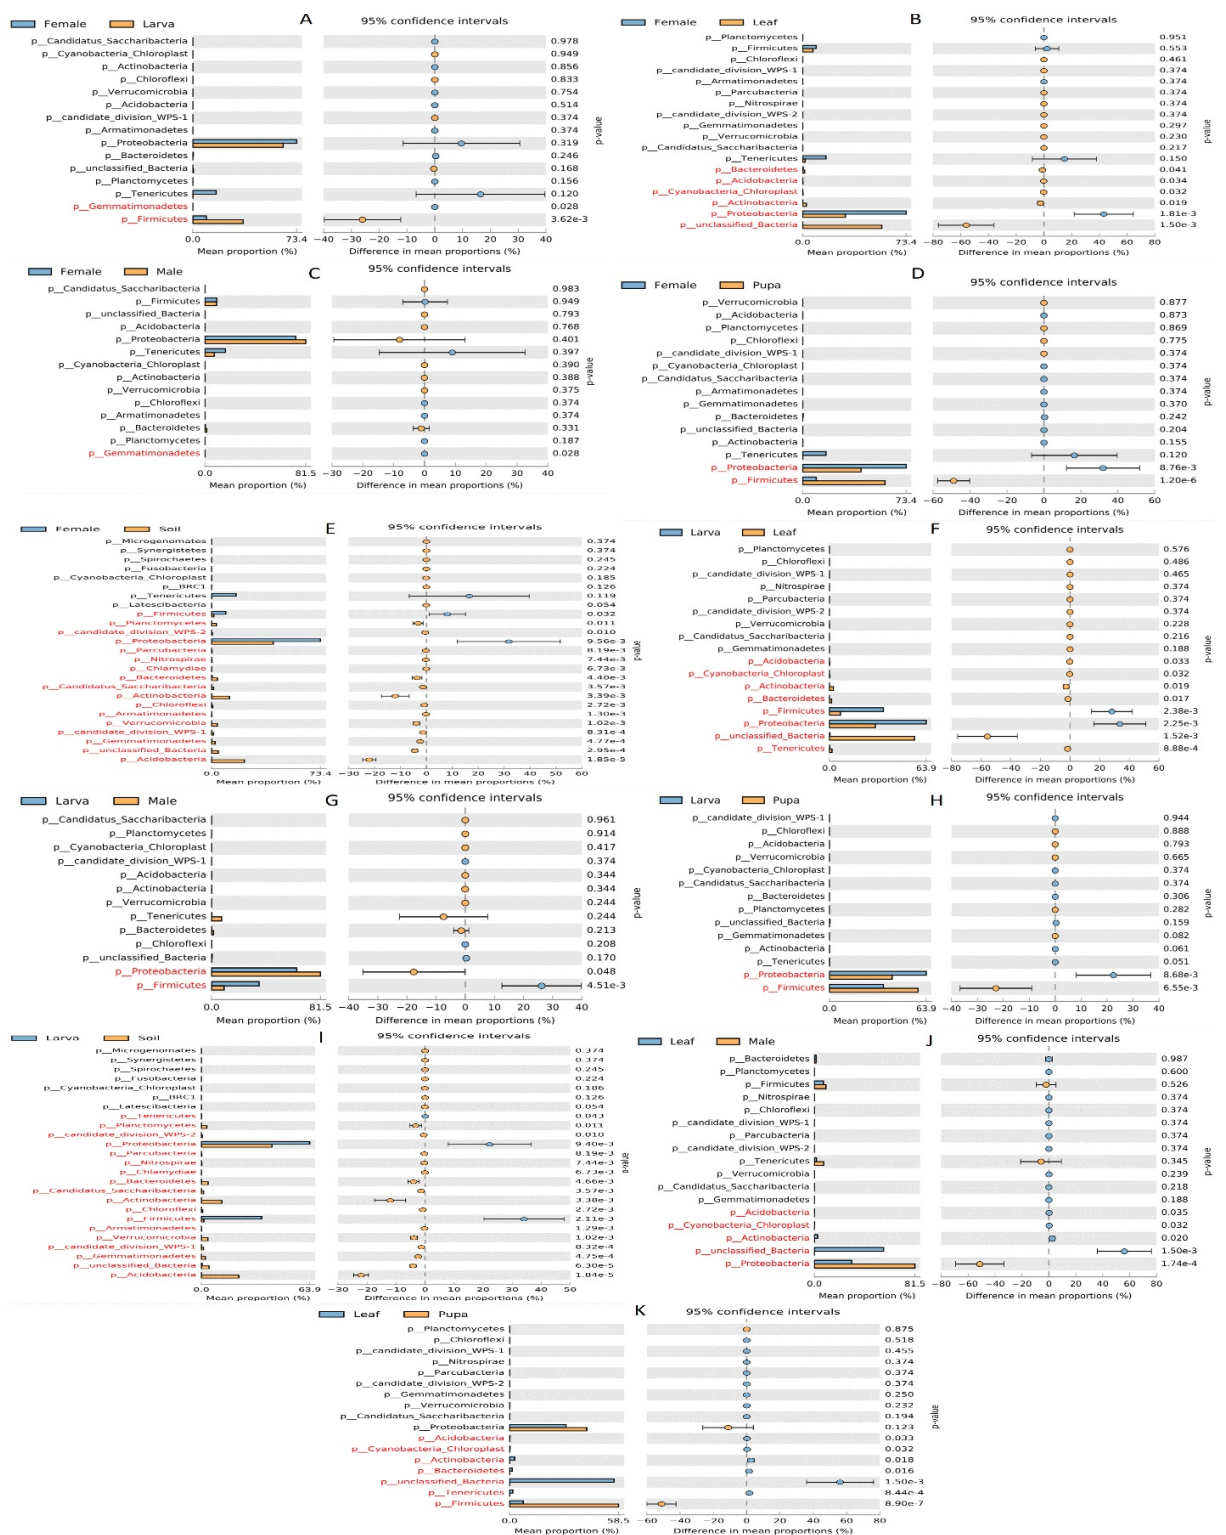

**Figure S1. (A–K) Kruskal boxplot showing the significant differences in top abundant bacterial phyla**

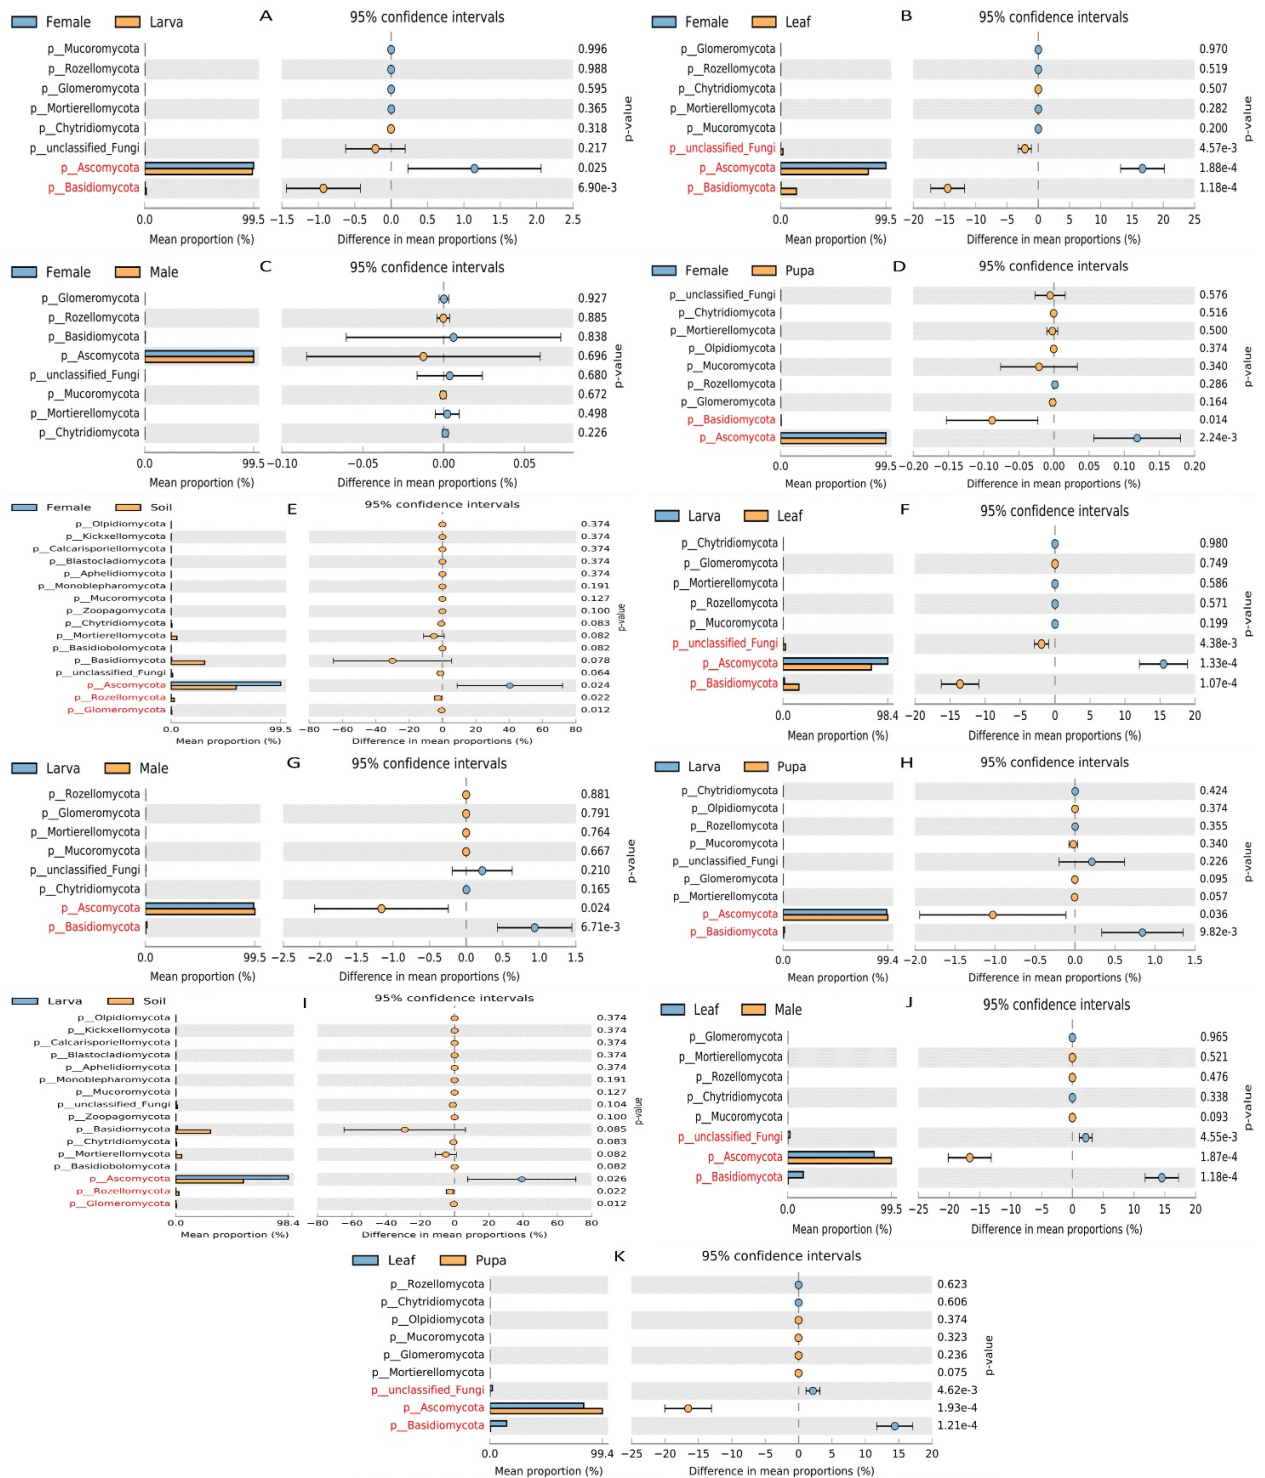

**Figure S2. (A–K)** Kruskal boxplot showing the significant differences in top abundant fungal phyla

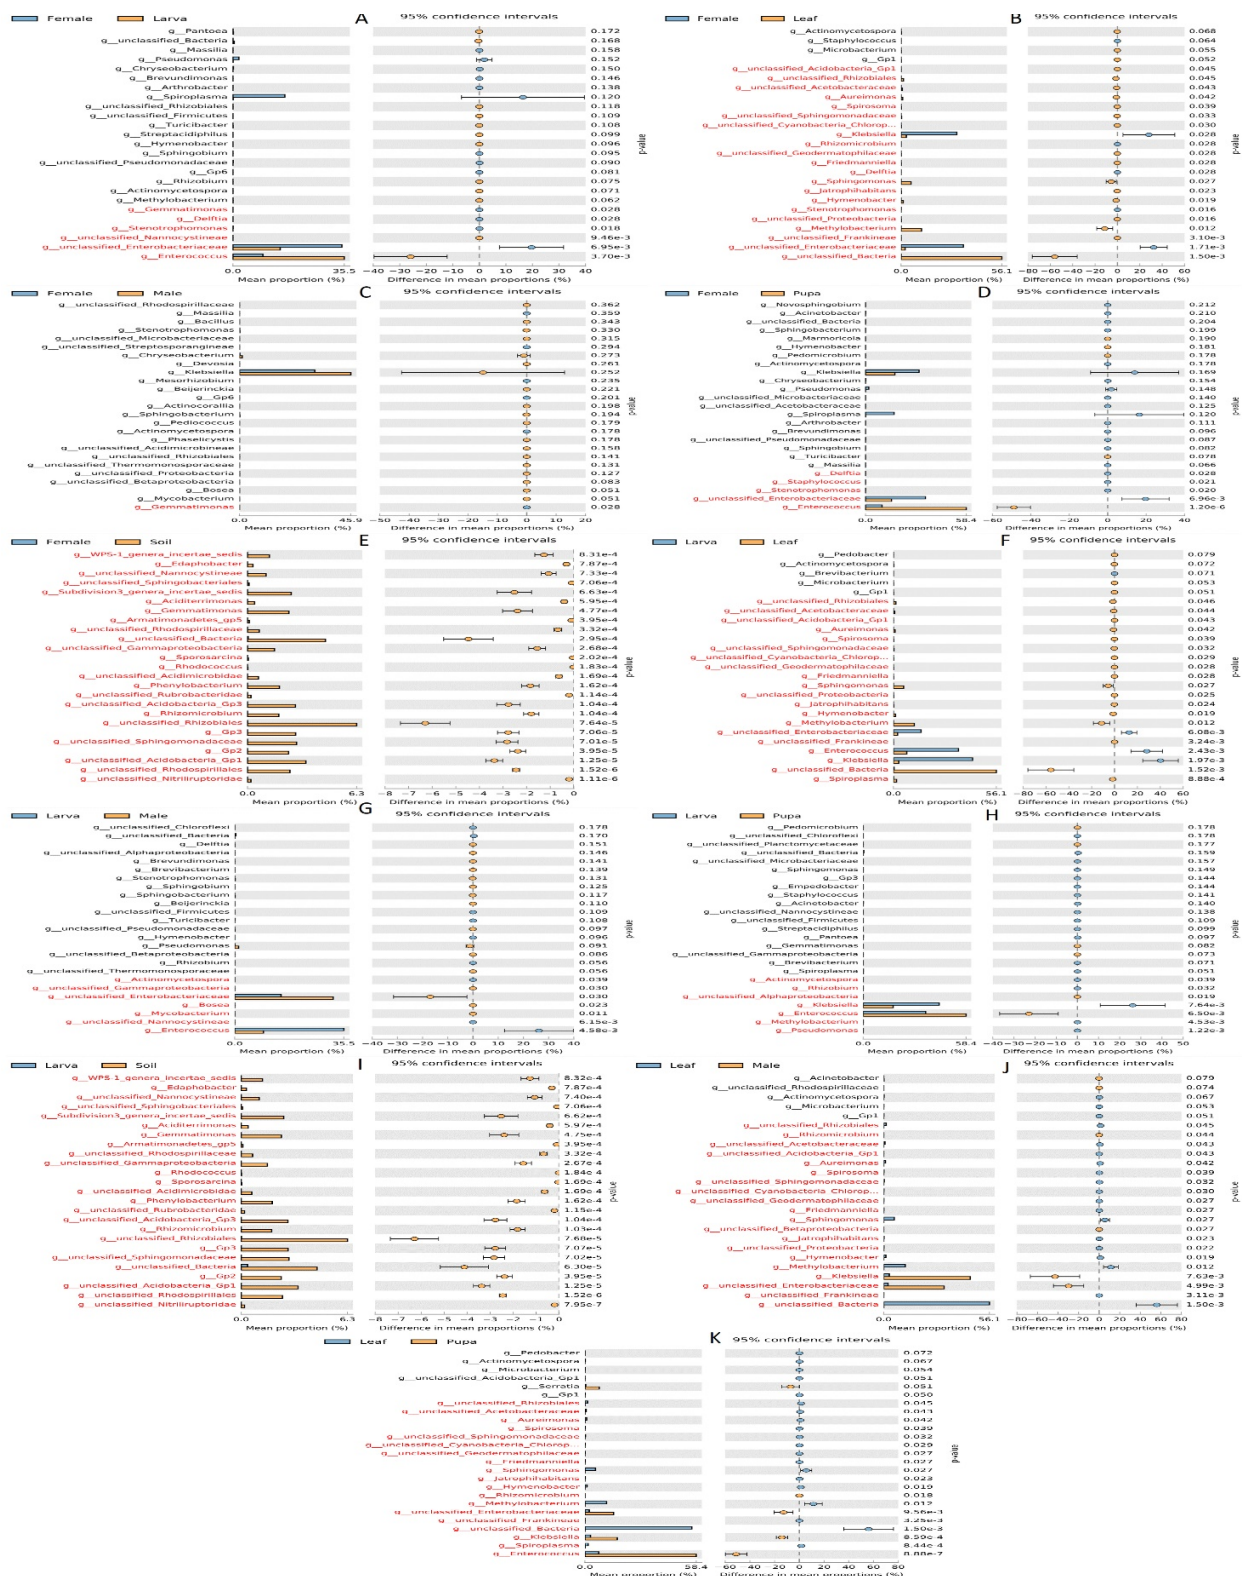

**Figure S3. (A–K) Kruskal boxplot showing the significant differences in top abundant bacterial genera**

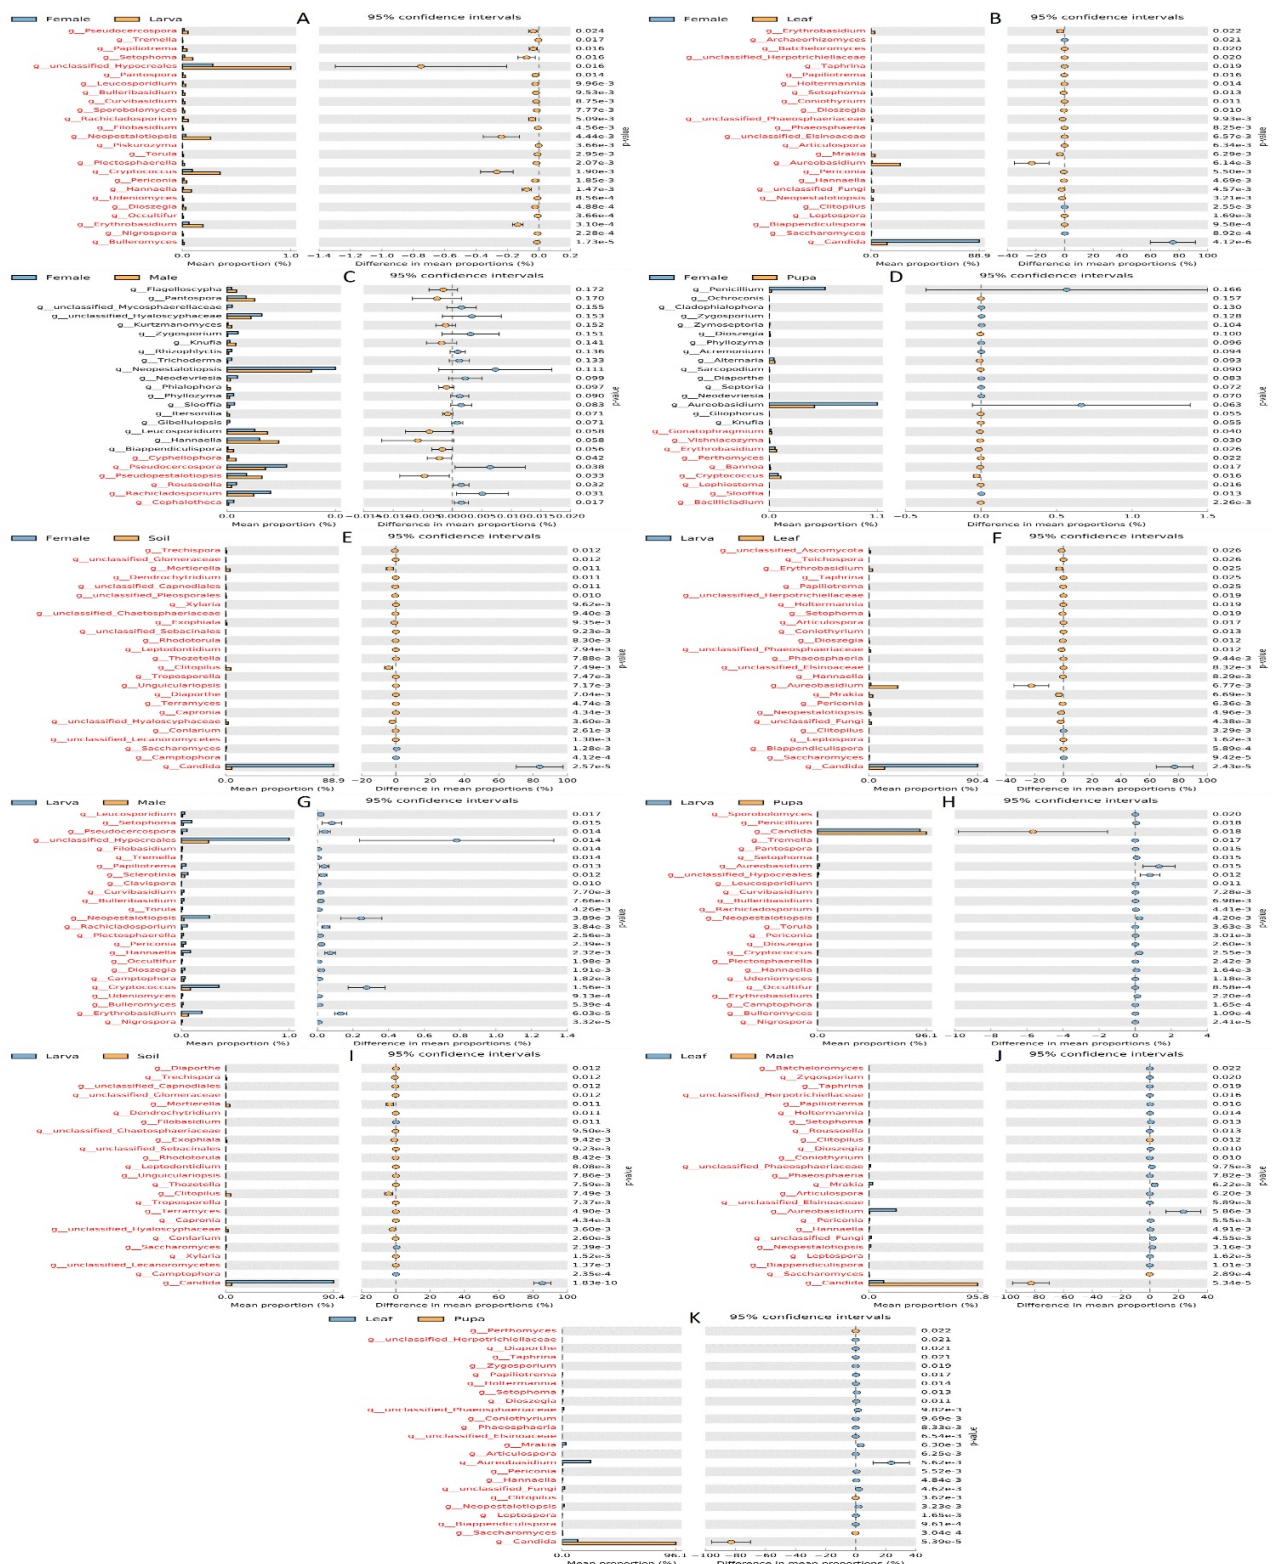

Figure S4. (A–K) Kruskal boxplot showing the significant differences in top abundant fungal genera
